# Supplementary material for: An integrative machine learning approach to discovering multi-level molecular mechanisms of obesity using data from monozygotic twin pairs
Source: PubMed Central journal article supplement (PMC7657920; doi:10.1098/rsos.200872), 2020-10-21
Supplement: rsos200872supp2.pdf [file rsos200872supp2.pdf]

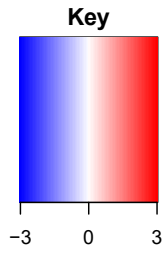

Dietary Data

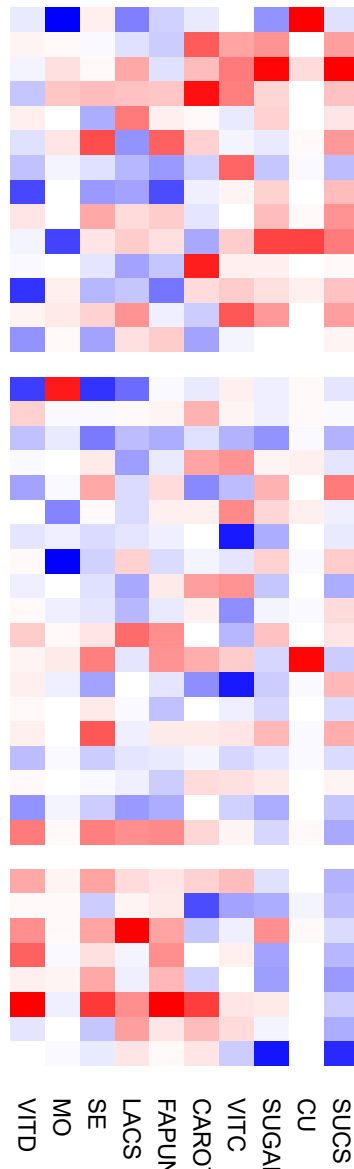

Methylation Data

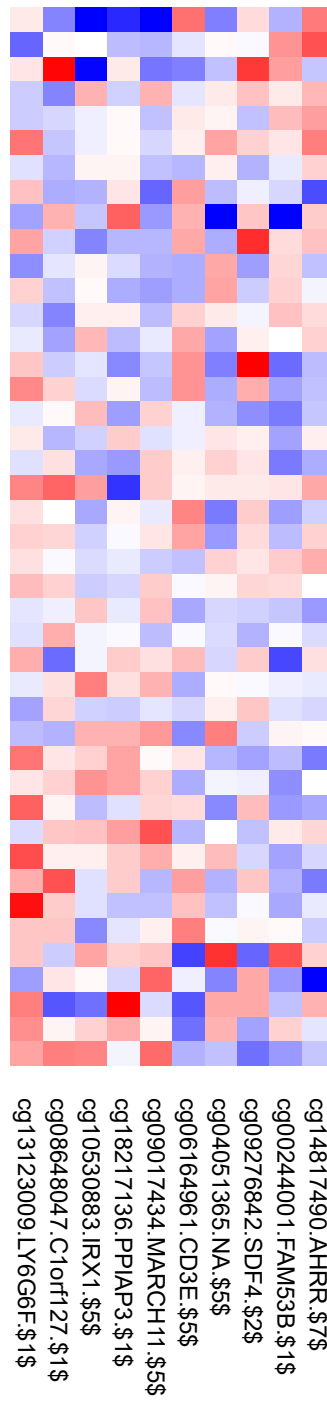

- twin pair 35
- twin pair 40
- twin pair 20
- twin pair 41
- twin pair 32
- twin pair 29
- twin pair 2
- twin pair 22
- twin pair 39
- twin pair 34
- twin pair 17
- twin pair 38
- twin pair 6
- twin pair 13
- twin pair 15
- twin pair 5
- twin pair 11
- twin pair 37
- twin pair 14
- twin pair 3
- twin pair 18
- twin pair 27
- twin pair 42
- twin pair 23
- twin pair 19
- twin pair 33
- twin pair 31
- twin pair 4
- twin pair 9
- twin pair 30
- twin pair 1
- twin pair 43
- twin pair 24
- twin pair 16
- twin pair 10
- twin pair 8
- twin pair 36
- twin pair 21
- twin pair 12
- twin pair 7
- twin pair 25
- twin pair 26
- twin pair 28
