# Supplementary material for: An integrative machine learning approach to discovering multi-level molecular mechanisms of obesity using data from monozygotic twin pairs
Source: PubMed Central journal article supplement (PMC7657920; doi:10.1098/rsos.200872), 2020-10-21
Supplement: rsos200872supp3.pdf [file rsos200872supp3.pdf]

Key

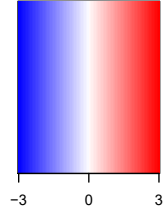

Dietary Data

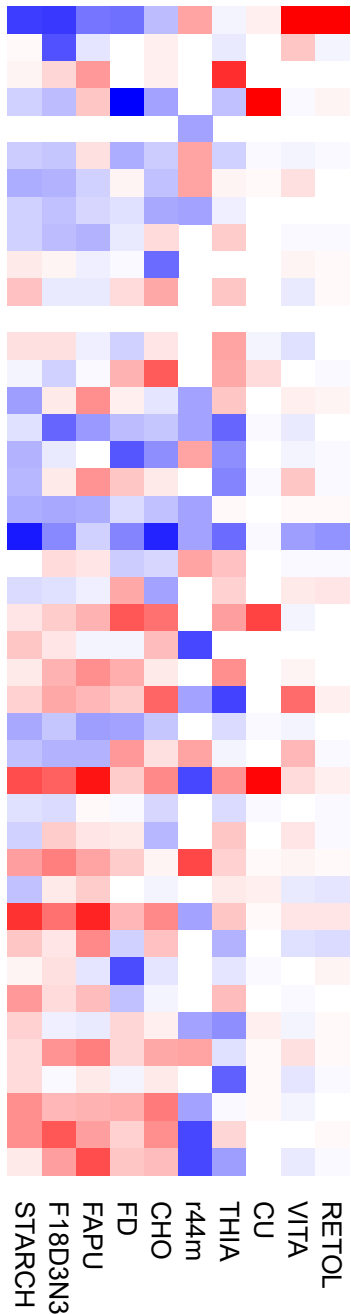

Cytokine Data

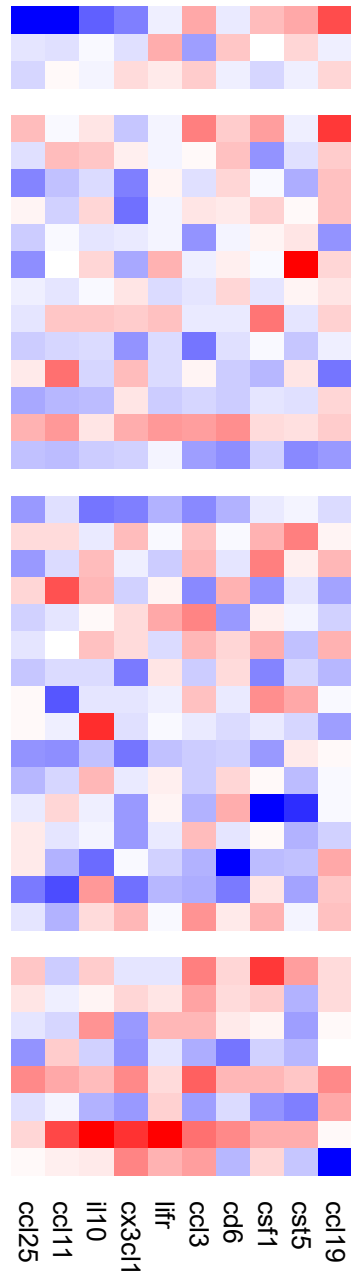

Clinical Data

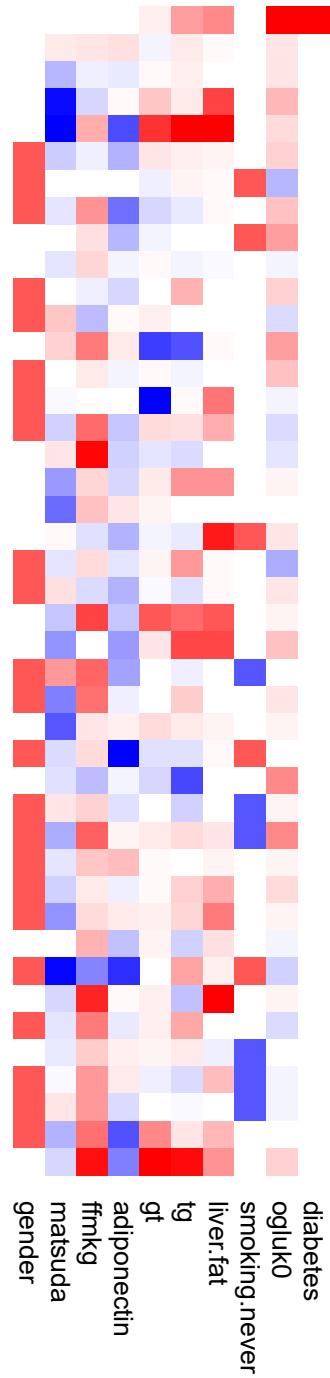

twin pair 38  
twin pair 17  
twin pair 26  
twin pair 35  
twin pair 10  
twin pair 1  
twin pair 11  
twin pair 24  
twin pair 43  
twin pair 28  
twin pair 6  
twin pair 15  
twin pair 36  
twin pair 20  
twin pair 32  
twin pair 2  
twin pair 27  
twin pair 30  
twin pair 9  
twin pair 37  
twin pair 8  
twin pair 12  
twin pair 34  
twin pair 22  
twin pair 25  
twin pair 41  
twin pair 42  
twin pair 40  
twin pair 31  
twin pair 19  
twin pair 23  
twin pair 16  
twin pair 18  
twin pair 29  
twin pair 13  
twin pair 4  
twin pair 7  
twin pair 14  
twin pair 21  
twin pair 5  
twin pair 39  
twin pair 33  
twin pair 3
