# Supplementary material for: An integrative machine learning approach to discovering multi-level molecular mechanisms of obesity using data from monozygotic twin pairs
Source: PubMed Central journal article supplement (PMC7657920; doi:10.1098/rsos.200872), 2020-10-21
Supplement: rsos200872supp4.pdf [file rsos200872supp4.pdf]

### Key

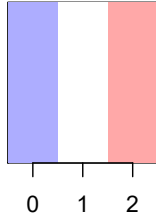

### Genotype Data

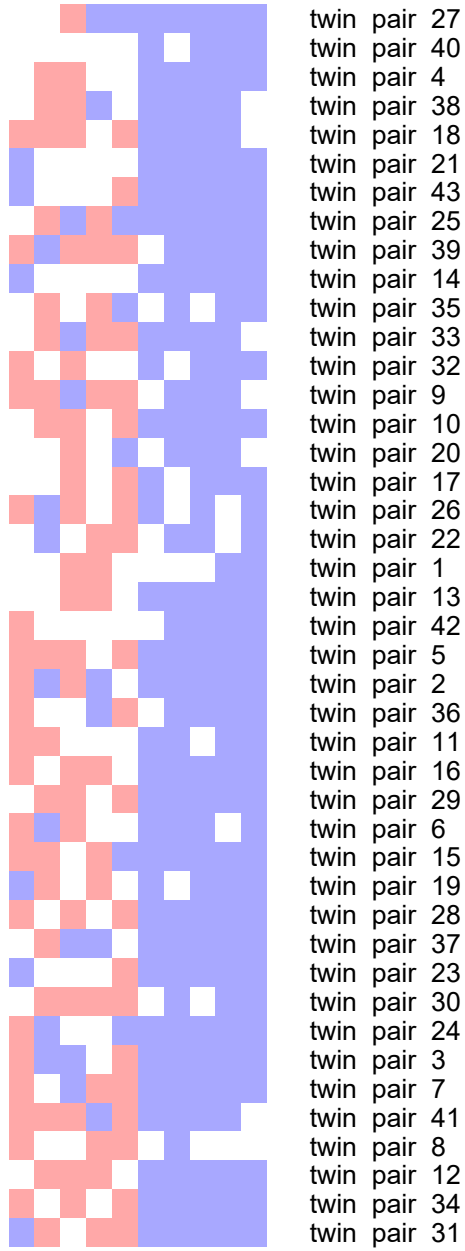

rs10790162 A\_BUD13\_\$3  
rs538641 A\_NCALD\_\$3  
rs10518107 A\_ADAMTS3\_\$2  
rs11231693 A\_MACROD1\_VEGFB\_\$2  
rs2280401 A\_RPS11\_\$4  
rs2820443 T\_LYPLAL1\_\$2  
rs10499694 A\_DDC\_\$2  
rs3923113 A\_GRB14\_\$3  
rs1046934 A\_TSEN15\_\$2  
rs891088 A\_INSR\_\$2
