# Supplementary material for: An integrative machine learning approach to discovering multi-level molecular mechanisms of obesity using data from monozygotic twin pairs
Source: PubMed Central journal article supplement (PMC7657920; doi:10.1098/rsos.200872), 2020-10-21
Supplement: rsos200872supp5.pdf [file rsos200872supp5.pdf]

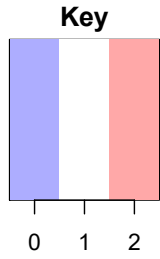

**Genotype Data**

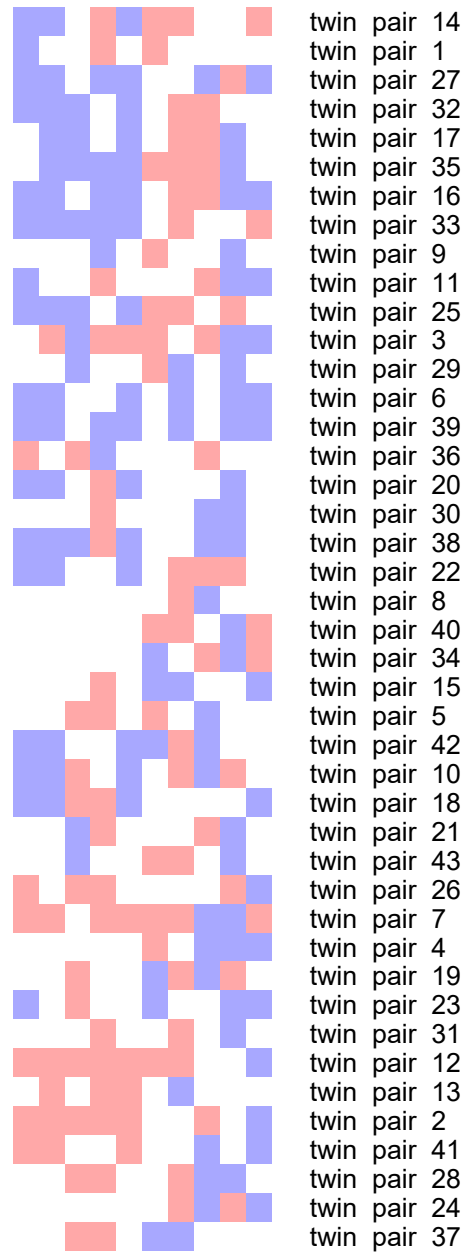

rs11126185 G LOC391383\_4  
 rs644587 T\_IL12A\_4  
 rs972283 G\_KLF14\_3  
 rs10742752 C\_SYT13\_2  
 rs1337332 C\_HS3ST5\_2  
 rs1421085 C\_FTO\_2  
 rs552976 G\_G6PC2,ABCB11\_3  
 rs13083798 A\_PRBM1\_2  
 rs1558902 A\_FTO\_1  
 rs11642841 A\_FTO\_3
